# Supplementary material for: A Systems Biology Approach to Investigate Kinase Signal Transduction Networks That Are Involved in Triple Negative Breast Cancer Resistance to Cisplatin
Source: MDPI journal article supplement (doi:10.3390/jpm12081277), 2022-08-03
Supplement: s1 [file s1]

**Supplementary Materials and Methods:** List of antibodies analysed on the Reverse Phase Protein Array platform.

| Antibody                  | Cat#      | Company    | Dil    | Host |
|---------------------------|-----------|------------|--------|------|
| AKT (S473)                | 9271      | CellSig    | 1:250  | R    |
| AKT (T308)                | 2965      | CellSig    | 1:500  | R    |
| Akt2                      | 2964      | CellSig    | 1:50   | R    |
| AMPK (T172)               | 2535      | CellSig    | 1:250  | R    |
| AMPKalpha1                | 2532      | CellSig    | 1:250  | R    |
| Bcl-2                     | MO887     | Dako       | 1:250  | R    |
| Bcl-2 (S70)               | 2827      | CellSig    | 1:100  | R    |
| Bcl-2 (T56)               | 2875      | CellSig    | 1:100  | R    |
| Caspase 8                 | 9746      | CellSig    | 1:1000 | M    |
| Caspase-7, cleaved (D198) | 9491      | CellSig    | 1:100  | R    |
| Caspase-9, cleaved (D315) | 9505      | CellSig    | 1:100  | R    |
| Caspase-9, cleaved (D330) | 9501      | CellSig    | 1:100  | R    |
| Chk-1                     | 2345      | CellSig    | 1:250  | R    |
| Chk-1 (S345)              | 2348      | CellSig    | 1:50   | R    |
| C-Raf                     | 04-739    | Millipore  | 1:250  | R    |
| c-Raf (S338)              | 9427      | CellSig    | 1:200  | R    |
| EGFR                      | 2232      | CellSig    | 1:100  | R    |
| FAK                       | 1700-1    | Epitomics  | 1:500  | R    |
| FAK (Y925)                | 3284      | CellSig    | 1:4000 | R    |
| Gab1                      | 3232      | CellSig    | 1:200  | R    |
| Gab1 (Y627)               | 3233      | CellSig    | 1:500  | R    |
| GSK-3 $\beta$             | 610201    | BD         | 1:300  | M    |
| GSK-3 $\beta$ (S9)        | 9336      | CellSig    | 1:500  | R    |
| HER2                      | MS-325-P1 | Lab Vision | 1:1000 | M    |
| HER2 (Y1248)              | 06-229    | Upstate    | 1:750  | R    |
| HIAP-2 (cIAP-1)           | 07-759    | Millipore  | 1:250  | R    |
| IGFIR-Beta                | 3027      | CellSig    | 1:500  | R    |
| MAPK - ERK 1/2            | 9102      | CellSig    | 1:200  | R    |
| MAPK (T202/Y204) -ERK1/2  | 4377      | CellSig    | 1:1200 | R    |
| MEK1                      | 1235-1    | Epitomics  | 1:1200 | R    |
| MEK1/2 (S217/221)         | 9154      | CellSig    | 1:1000 | R    |
| mTOR                      | 2983      | CellSig    | 1:400  | R    |
| mTOR (S2448)              | 2971      | CellSig    | 1:100  | R    |
| mTOR (S2481)              | 2974      | CellSig    | 1:100  | R    |
| NF-kB-p65 (S536)          | 3033      | CellSig    | 1:100  | R    |

|                                          |           |           |        |   |
|------------------------------------------|-----------|-----------|--------|---|
| p27                                      | 1591-1    | Epitomics | 1:250  | R |
| p27 (T157)                               | AF1555    | R&D       | 1:150  | R |
| p38 MAP Kinase (T180/Y182)               | 9211      | CellSig   | 1:250  | R |
| p38_MAPK                                 | 9212      | CellSig   | 1:300  | R |
| p53                                      | 9282      | CellSig   | 1:3000 | R |
| p70 S6 Kinase                            | 1494-1    | Epitomics | 1:250  | R |
| p70 S6 Kinase (T389)                     | 9205      | CellSig   | 1:250  | R |
| PDK1                                     | 3062      | CellSig   | 1:100  | R |
| PDK1 (S241)                              | 3061      | CellSig   | 1:500  | R |
| PI3-Kinase p110alpha                     | 4255      | CellSig   | 1:100  | R |
| PKC-alpha                                | 05-154    | Upstate   | 1:2000 | M |
| PTEN                                     | 9552      | CellSig   | 1:1000 | R |
| S6 Ribosomal Protein (S235/236)<br>(2F9) | 4856      | CellSig   | 1:200  | R |
| S6 Ribosomal Protein (S240/244)          | 2215      | CellSig   | 1:3000 | R |
| Smac/Diablo                              | 2954      | CellSig   | 1:500  | M |
| Src                                      | 05-184    | Upstate   | 1:200  | M |
| Src (Y527)                               | 2105      | CellSig   | 1:400  | R |
| Src Family (Y416)                        | 2101      | CellSig   | 1:250  | R |
| Stat3                                    | 9132      | CellSig   | 1:1000 | R |
| Stat3 (Y705)                             | 9131      | CellSig   | 1:500  | R |
| Bak                                      | ab32371   | Abcam     | 1:200  | R |
| Bax                                      | 2772      | CellSig   | 1:250  | R |
| Bcl-xL                                   | 2762      | CellSig   | 1:250  | R |
| Mcl-1                                    | 5453      | CellSig   | 1:1000 | R |
| Apaf-1                                   | HPA031373 | Sigma     | 1:100  | R |
| Cytochrome C                             | 4280      | CellSig   | 1:2000 | R |
| Caspase 3                                | 9662      | CellSig   | 1:5000 | R |
| Caspase 9                                | 9502      | CellSig   | 1:1000 | R |
| cMET                                     | 3127      | CellSig   | 1:500  | M |
| cMET Y1234/Y1235                         | 3129      | CellSig   | 1:100  | R |
| RSK                                      | 9347      | CellSig   | 1:500  | R |
| P90RSK S380                              | 9341      | CellSig   | 1:250  | R |
| EGFR Y992                                | 2235      | CellSig   | 1:100  | R |
| EGFR Y1068                               | 2234      | CellSig   | 1:100  | R |
| lhda                                     | 3582      | CellSig   | 1:200  | R |
| tigar                                    | 137573    | AbCam     | 1:100  | R |
| her4                                     | 4795      | CellSig   | 1:100  | M |

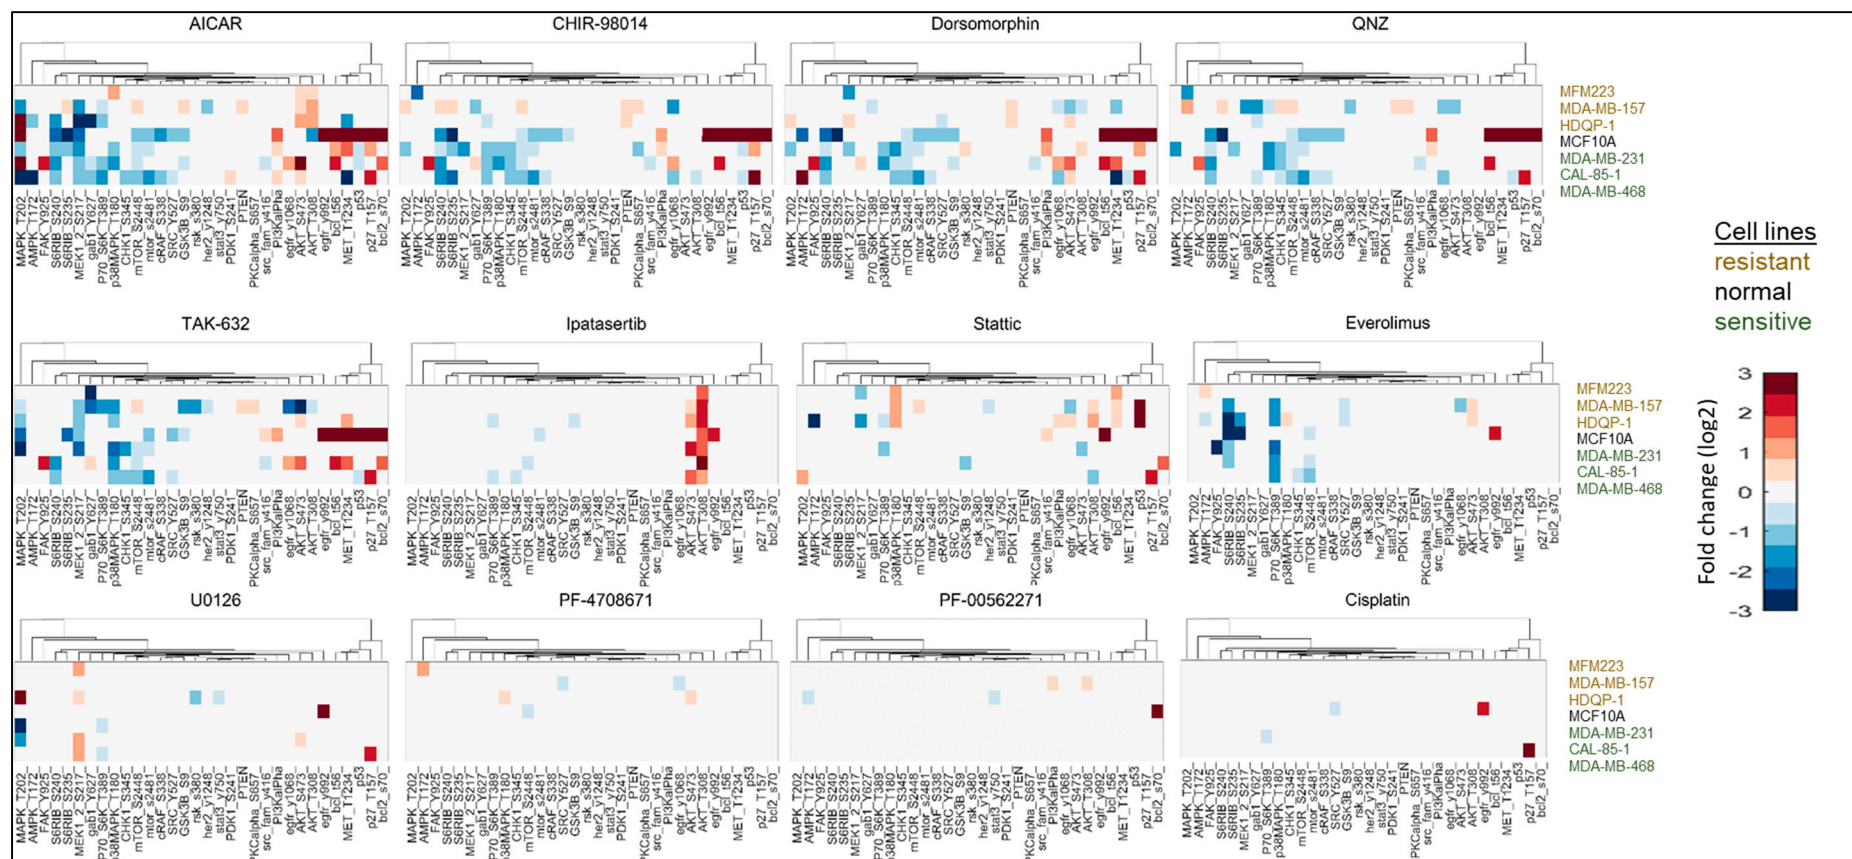

**Supplementary Figure S1. Hierarchical clustergrams of treatment induced signaling changes for each drug. Top three rows: resistant cell lines, bottom three rows: sensitive cell lines.**

(B1)

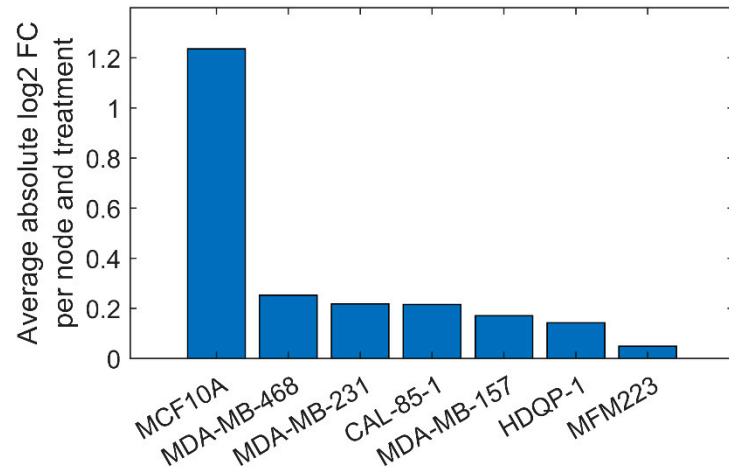

(B2)

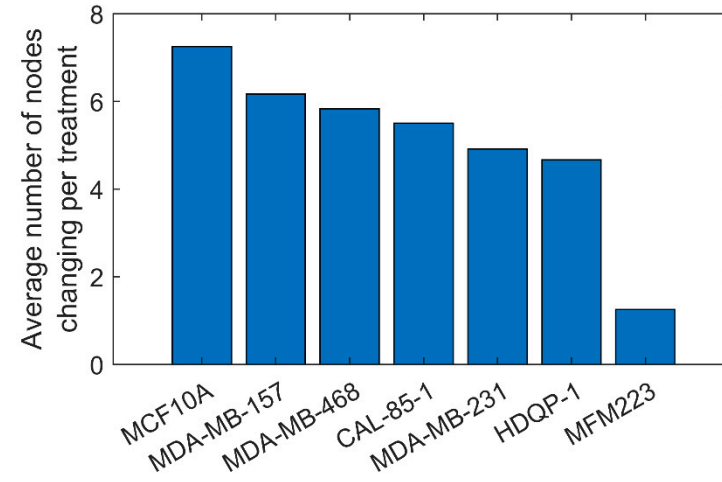

**Supplementary Figure S1B: Responsiveness of the cell lines in terms of their drug induced changes in network nodes.** (B1) Average mean fold-change of each cell line defined as the fold-changes of the network node averaged over all drugs and network nodes. (B2) Average number of nodes changing per drug (cut-off Students t-test p-value < 0.05).



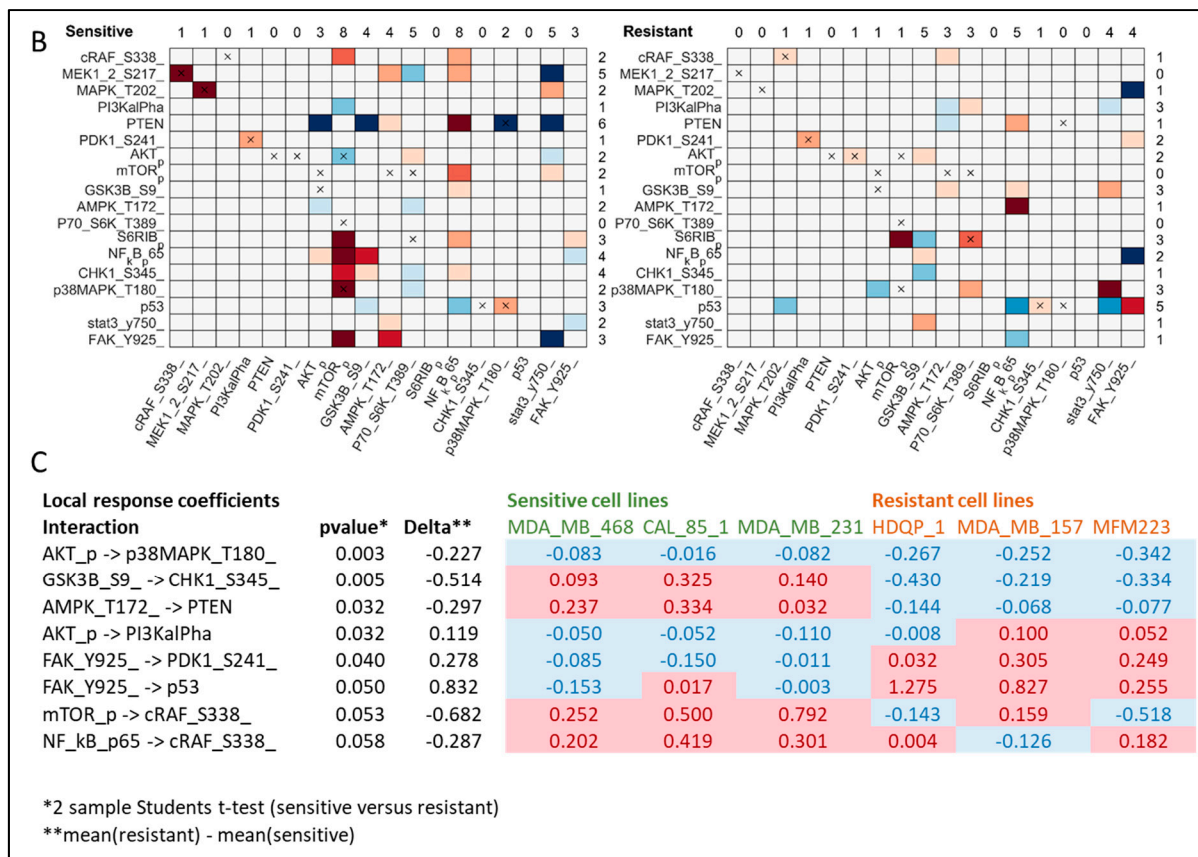

**Supplementary Figure S2B, C:** (B) Consensus networks for sensitive and resistant cell lines. The consensus network was calculated by filtering out inconsistent interactions; we kept only interactions for which the estimated local response coefficient  $r_{ij}$  were either all positive or all negative for the set of sensitive and resistant cell line. The consensus interactions strength was calculated as the mean  $r$ :  $r_{ij, \text{consensus}} = \text{mean}(r_{ij, \text{celllines}})$ , where celllines is the set of sensitive (left) and resistant (right) cell lines. The numbers above the rows and next to the columns indicate the number of non-zero interactions. (C) Table of the most significant interaction differences between sensitive and resistant cell lines. Negative values shaded blue indicate inhibition; positive values shaded red indicate activation.



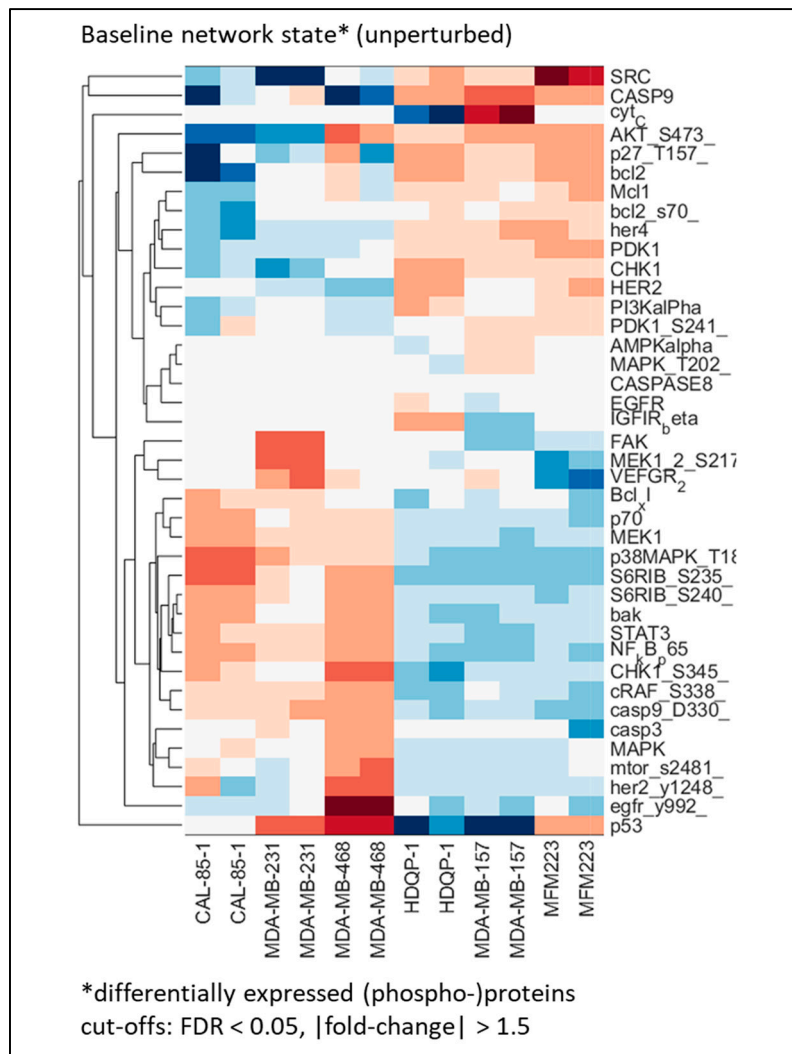

**Supplementary Figure S2D:** The most significant differences in the baseline network state in the unperturbed condition. The heatmap shows the hierarchical clustering was performed of the most significant changes. Cut-offs were false discovery rate  $FDR < 0.05$ , absolute fold change  $> 1.5$ . Green arrows indicate analytes of the PI3K-AKT signaling axis.

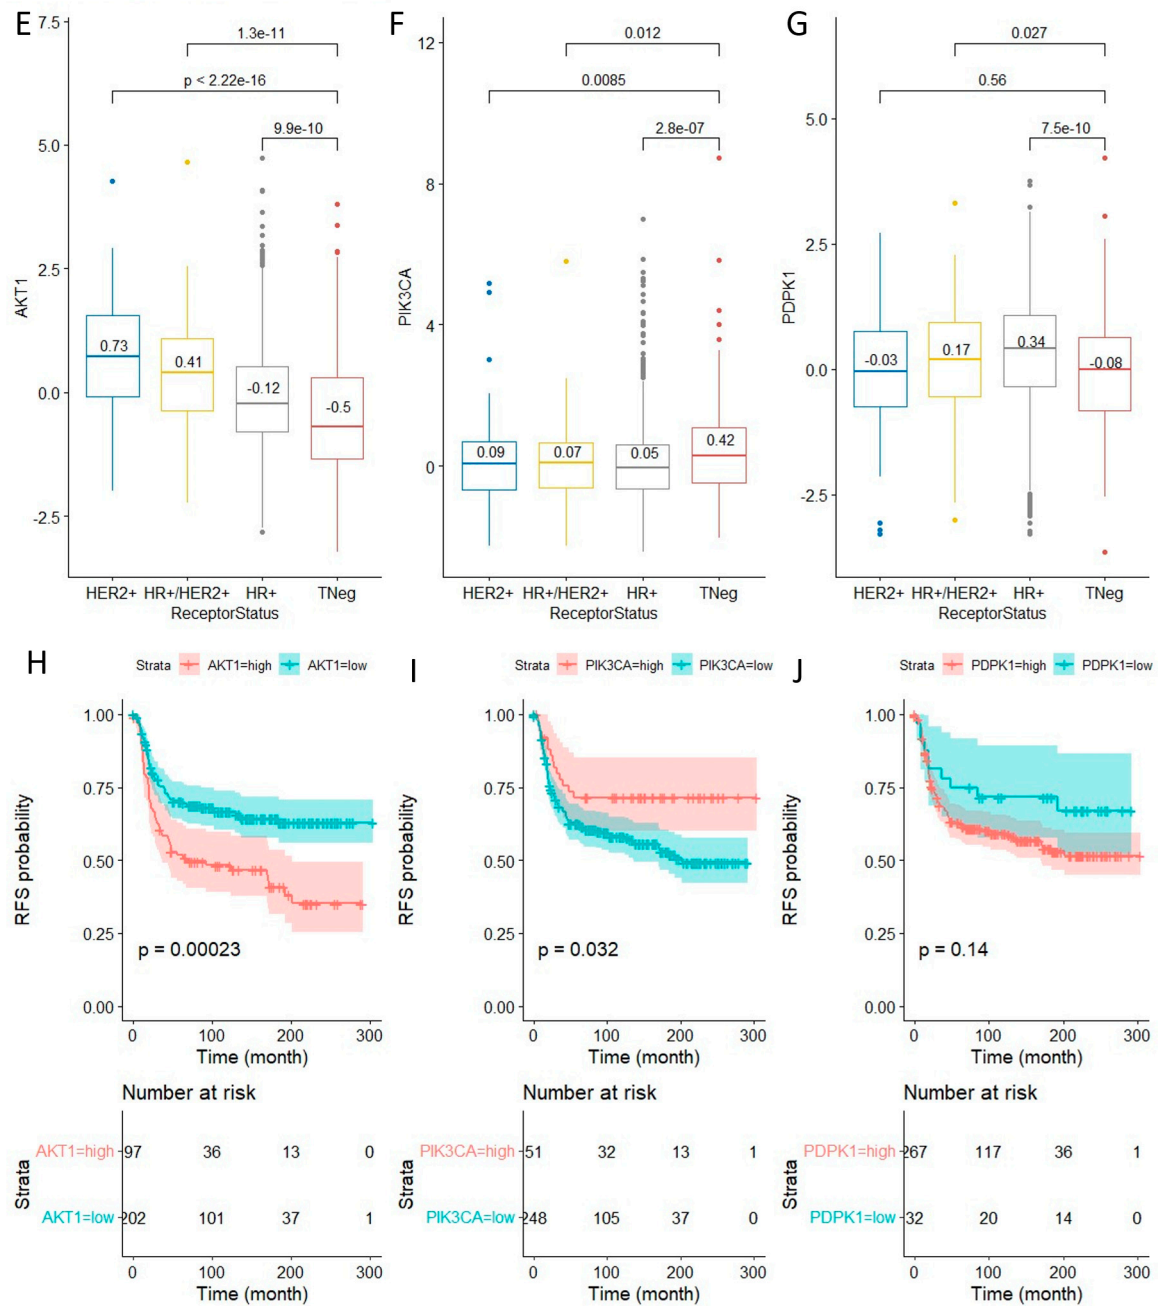

**Supplementary Figure S2E-J** Analysis of METABRIC data. (E-G) Boxplots of gene-expression distributions for the different subtypes as indicated; (E) AKT1, (F) PIK3CA, (G) PDPK1. Numbers in boxes indicate mean value of mRNA expression (log2), p-values on top of comparison bars from Wilcoxon rank-sum test. (H-J) Kaplan-Meier survival analysis based on the expression of each gene as indicated; (H) AKT1, (I) PIK3CA, (J) PDPK1. RFS: relapse free survival, p: p-value from logrank test, shaded area: 95% confidence interval.



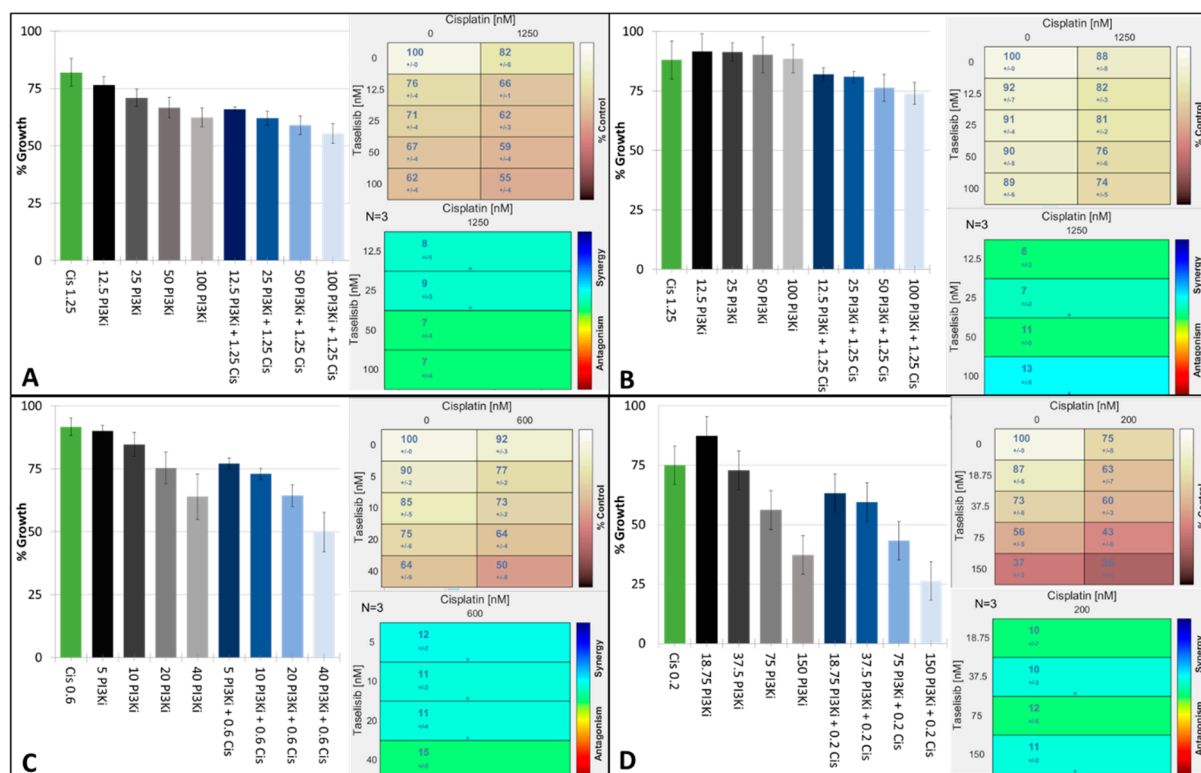

**Supplementary Figure S3:** Growth inhibitory effect of cisplatin in combination with Tasisib (PI3K inhibitor) in the (A) HDQP1 (B) MDAMB157 (C) CAL51 (D) BT20 breast cancer cell lines. Standard deviations are calculated from triplicate independent assays. Combifit analysis calculates the average % growth of either cisplatin or tasisib tested alone or in combination, whilst Loewe analysis calculates the synergy of the combination.
